# Supplementary material
Source: PubMed Central journal article supplement (PMC8853674)

## Supplemental Figure Legends

### Supplemental Figure 1

**Colony forming units (cfu)/g tissue of *Hif1a*<sup>IEC</sup> and *Hif1a*<sup>MC</sup> animals compared to their wildtype littermates 4 days post infection.** Non normalized cfu counts in indicated organs of (A) *Hif1a*<sup>IEC</sup> ( $n=7$ ) and (B) *Hif1a*<sup>MC</sup> ( $n=6$ ) mice and wildtype littermates. Data represent means with SEM. Statistical significance was determined according to Mann-Whitney U test (A, B).

### Supplemental Figure 2

**Pathoscore and macrophage infiltration in the healthy and *Salmonella* infected small intestine and colon of wildtypes and knock-outs utilized in this study.**(A) Pathoscore of small intestines and colons of healthy controls (Ctrl) and 4 days p.i. with *Salmonella* (*S. Tm*). Measured were edema/enlargement of the submucosa, neutrophil infiltration, goblet cell numbers as well as epithelial damage. Representative images of small intestines (B) and colons (C) 4 days post oral PBS administration (control) or *S. Tm* infection (p.i.) stained for F4/80 hematoxylin counterstaining of healthy control animals and 4 days p.i. (wildtype, *Hif1a*<sup>IEC</sup>, *Hif1a*<sup>MC</sup>).

### Supplemental Figure 3

***Salmonella*-induced HIF-1 $\alpha$  and HIF-2 $\alpha$  stabilization in wildtype and knock-out IECs and BMDMs.** (A) HIF-2 $\alpha$  and (B) HIF-1 $\alpha$  western blots of nuclear extracts of IECs of uninfected controls and infected (4 days p.i.) WT littermates and *Hif1a*<sup>IEC</sup> mice ( $n=3$ ) and (C) WT and *Hif1a*<sup>IECind</sup> animals harboring a Tamoxifen-inducible HIF-1 $\alpha$  knock-out in IECs ( $n=2$ ). (D) *Hif1a* mRNA expression relative to  $\beta$ -actin upon *Salmonella* (*S. Tm*) infection in WT and *Hif1a*<sup>IECind</sup> IECs ( $n=3$ ). (E) HIF-2 $\alpha$  western blot of nuclear extracts of uninfected ( $n=2$ ) and infected (4 hours; MOI 10;  $n=3$ ) BMDMs isolated from WT and *Hif1a*<sup>MC</sup> mice. Data represent means with SEM. \*  $P < 0.05$  according to Mann-Whitney U test (D).

### Supplemental Figure 4

**FACS-based Leukocyte Quantification in lamina propria of uninfected WT littermates, *Hif1a*<sup>IEC</sup> and *Hif1a*<sup>MC</sup> animals.** (A) Gating strategy for DC and myeloid cell gating. Counts of Neutrophils, including P1 and P2 Neutrophils, Eosinophils and Macrophages in the small intestinal Lamina propria of (B) *Hif1a*<sup>IEC</sup> and (C) *Hif1a*<sup>MC</sup> mice and their WT littermates ( $n=3$ ). Data represent means with SEM. \*  $P < 0.05$ ; \*\*  $P < 0.01$ ; \*\*\*  $P < 0.001$  according to Mann-Whitney U test (B, C).

Supplemental Figure 5

**SPI-2 deficiency in *Salmonella* does not interfere with intracellular HIF-1-dependent bactericidal functions of Macrophages (A)** Intracellular survival of *Salmonella* in bone marrow derived WT and HIF-1 $\alpha$  deficient (*Hif1a*<sup>MC</sup>) macrophages within 4 hours of infection utilizing wildtype *Salmonella*, a  $\Delta$ *sseB* mutant and the complemented strain  $\Delta$ *sseB**psseB* ( $n=3$ ). Data represent means with SEM. \* P < 0.05; \*\* P < 0.01; \*\*\* P < 0.001 according to one-way analysis of variance followed by Tukey post hoc test (A, B).

**A*****Hif1a*<sup>IEC</sup>**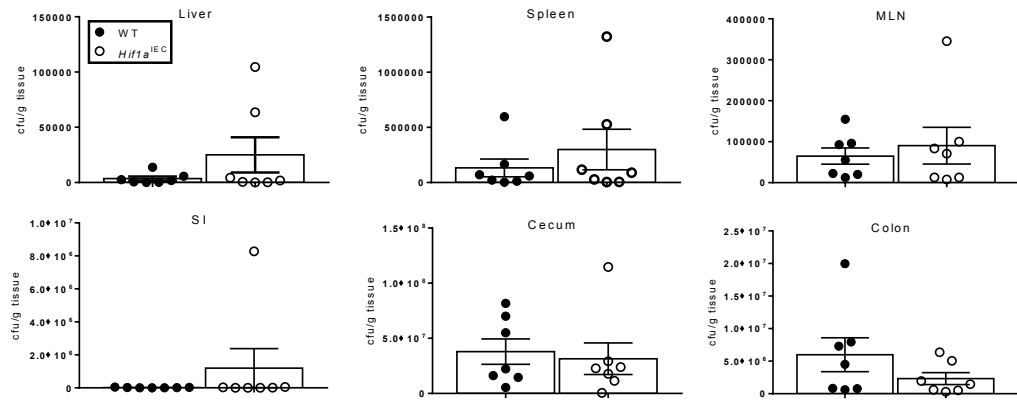**B*****Hif1a*<sup>MC</sup>**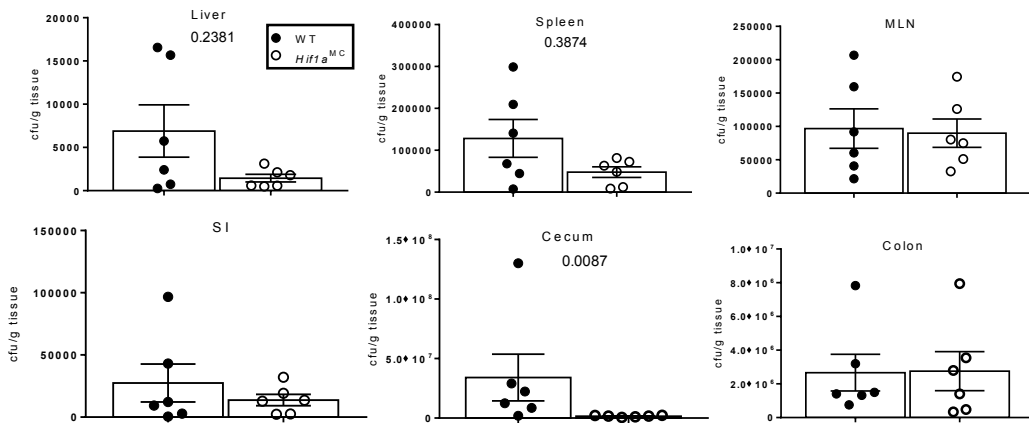

**A**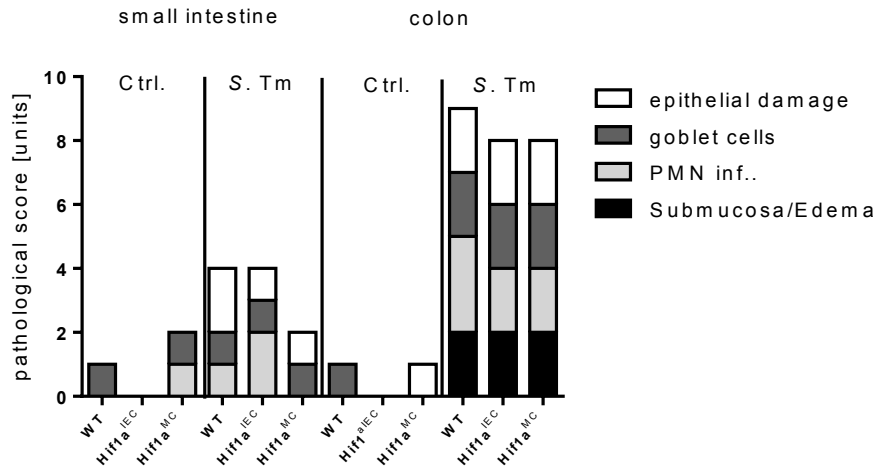**B**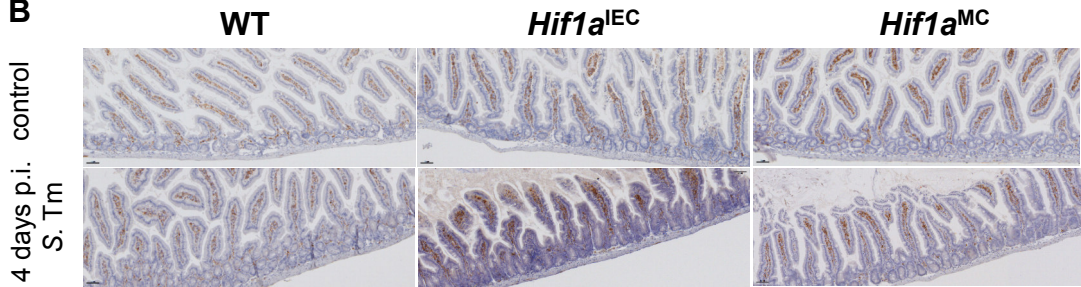**C**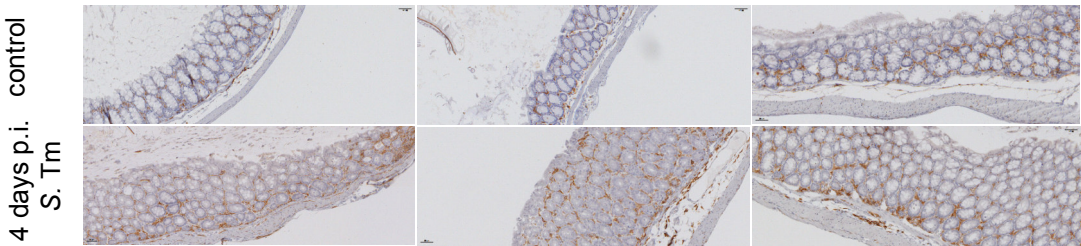

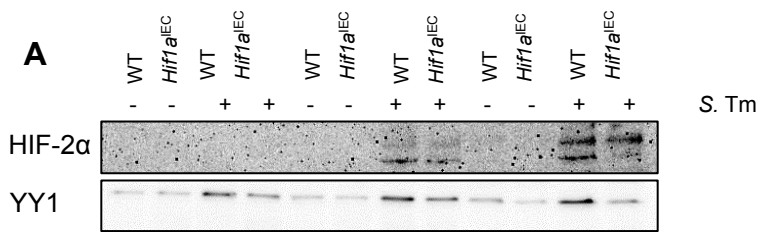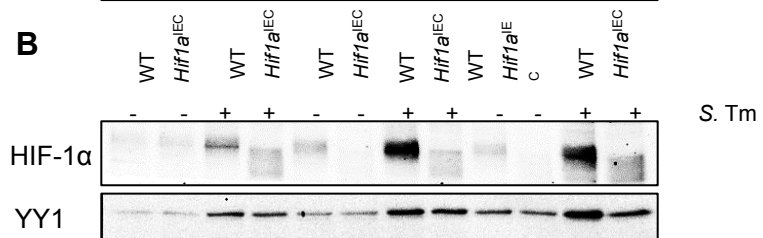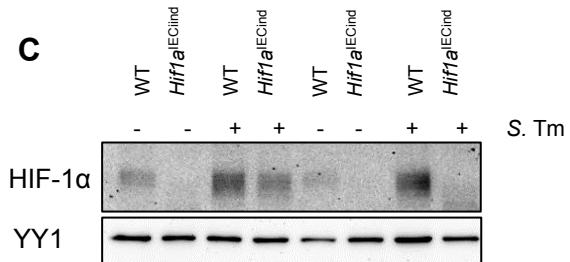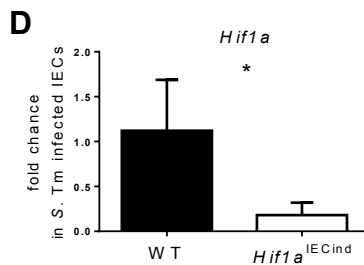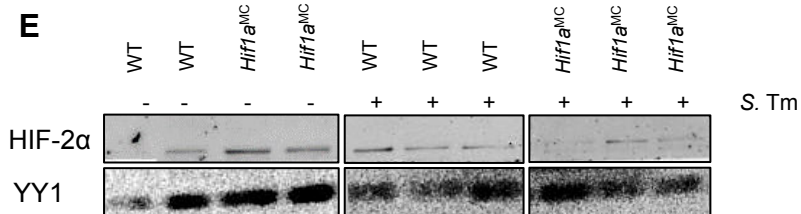

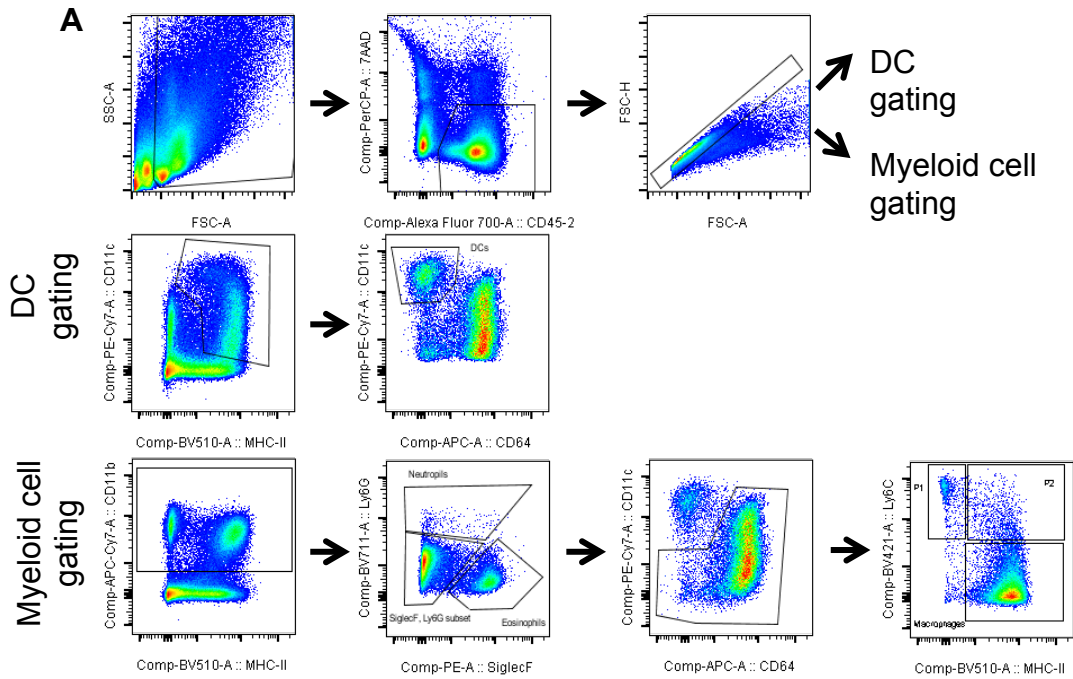

**B** Leukocytes in Lamina Propria of healthy WT and *Hif1a*<sup>IEC</sup> mice

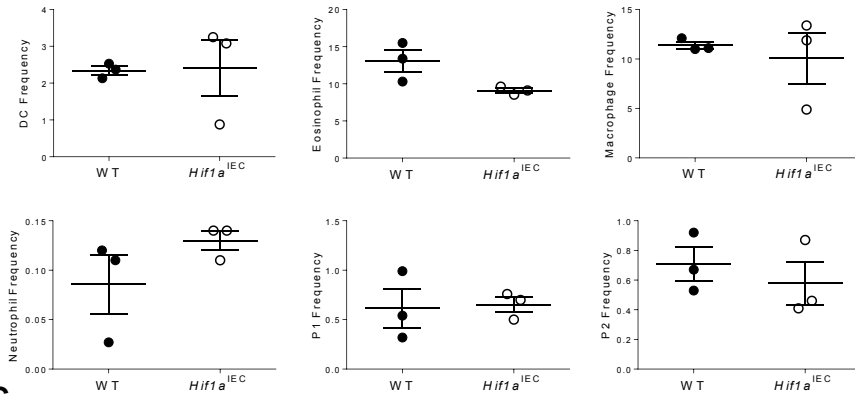

**C** Leukocytes in Lamina Propria of healthy WT and *Hif1a*<sup>MC</sup> mice

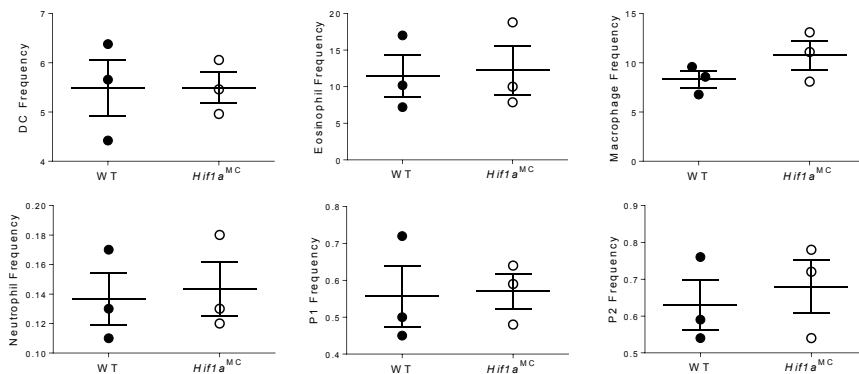

# Salmonella

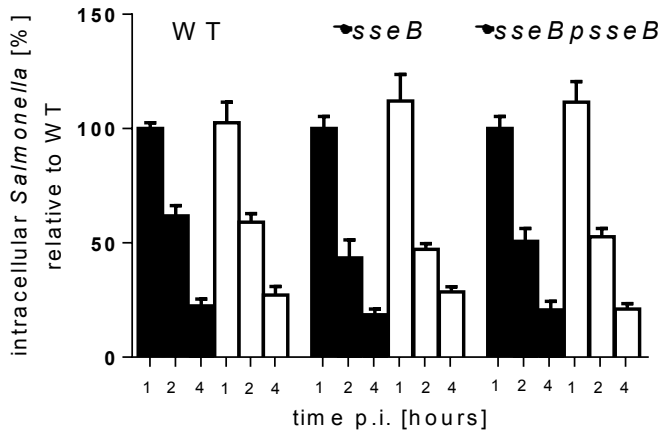

Supplement: iai.00222-21-s0001.pdf [file iai.00222-21-s0001.pdf]
